# Supplementary material for: Rural Women’s Experiences in Accessing Prenatal and Postnatal Health Services: A Qualitative Study
Source: Research Square preprint supplement (doi:10.21203/rs.3.rs-8373535/v1), 2026-01-30
Supplement: Supplementary file 1 [file b6da79af0a2593c80b55d4be.docx]

# Supplementary File 1. Semi-Structured Interview Guide

This semi-structured interview guide was developed specifically for the current study based on an extensive review of the relevant literature and expert opinions. The guide was pilot-tested with three women to ensure clarity and comprehensibility before final data collection.

## Section 1. Sociodemographic and Obstetric Characteristics (Closed-ended Questions)

- Age

- Educational level

- Marital status

- Employment status

- Household income level

- Family structure (nuclear/extended family)

- Gravida

- Parity

- History of abortion

- Number of living children

- Current pregnancy or postpartum status

- Gestational week or postpartum period (in weeks)

## Section 2. Experiences of Accessing Prenatal and Postnatal Health Services (Open-ended Questions)

1. **Can you describe your experiences in accessing health services during pregnancy?**
2. **What kinds of difficulties did you encounter in accessing antenatal (prenatal) health care services?**
   (e.g., transportation, financial situation, place of residence)
3. **What factors facilitated your access to health care services during pregnancy?**
4. **Can you describe your experiences in accessing health services during the postpartum period?**
5. **What difficulties did you face in accessing postnatal (postpartum) health care services?**
6. **What factors facilitated your access to health care services during the postpartum period?**
7. **How would you describe your interactions with health professionals (such as midwives, doctors, or nurses) during pregnancy and after birth?**
8. **Did you feel adequately supported and informed by health professionals during these periods? Why or why not?**
9. **How did your family members, partner, or social network influence your access to health care services?**
10. **How do you think living in a rural area affected your access to antenatal and postnatal health services?**
11. **What are your suggestions for improving access to antenatal and postnatal health care services for women living in rural areas?**
